# Supplementary material for: Synthesis of In2O3 nanoparticle/TiO2 nanobelt heterostructures for near room temperature ethanol sensing
Source: Royal Society of Chemistry journal article supplement (doi:10.1039/c7ra00011a), 2017-01-01
Supplement: c7ra00011a1.pdf [file c7ra00011a1.pdf]

## Supporting Information

### Synthesis of $\text{In}_2\text{O}_3$ nanoparticle/ $\text{TiO}_2$ nanobelt heterostructures for near room temperature ethanol sensing

Yujie Li<sup>1</sup>, Hongru Yang<sup>1</sup>, Jian Tian\*, Xiaolin Hu, Hongzhi Cui\*

School of Materials Science and Engineering, Shandong University of Science and Technology,  
Qingdao 266590, China.

Email: jiantian@sdust.edu.cn, cuihongzhi1965@163.com

<sup>1</sup> These authors contributed equally.

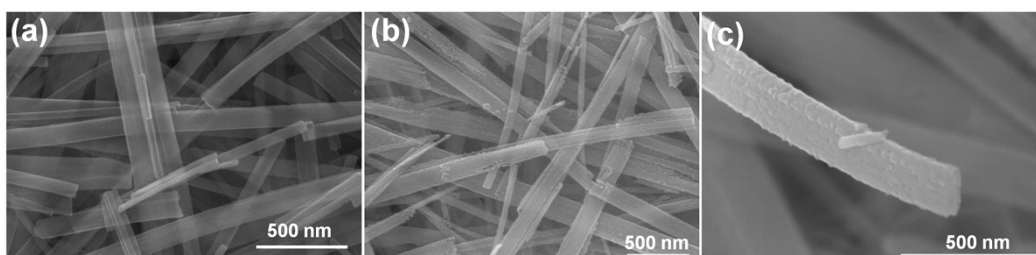

**Figure S1.** SEM image of (a)  $\text{TiO}_2$  nanobelts and (b, c) surface-coarsened  $\text{TiO}_2$  nanobelts.

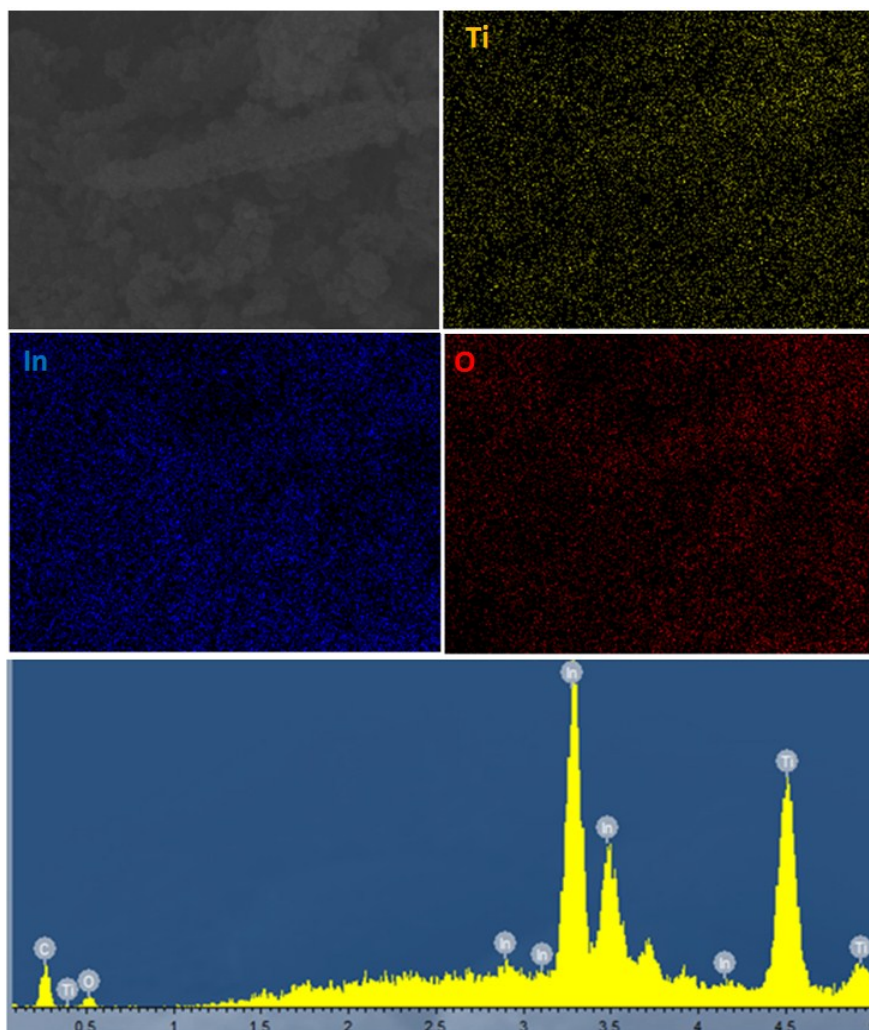

**Figure S2.** Elemental energy-dispersive X-ray spectroscopy (EDS) mapping of the obtained  $\text{In}_2\text{O}_3$  nanoparticle/ $\text{TiO}_2$  nanobelt heterostructures (mole ratio 1:1).

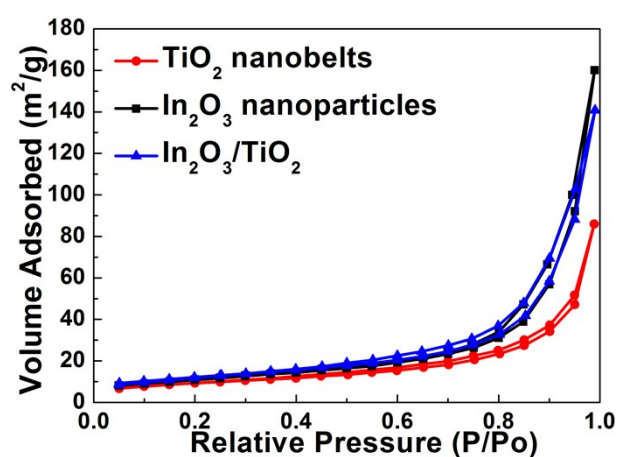

**Figure S3.** Nitrogen adsorption-desorption isotherms of  $\text{TiO}_2$  nanobelts,  $\text{In}_2\text{O}_3$  nanoparticles and  $\text{In}_2\text{O}_3$  nanoparticle/ $\text{TiO}_2$  nanobelt heterostructures (mole ratio 1:1).

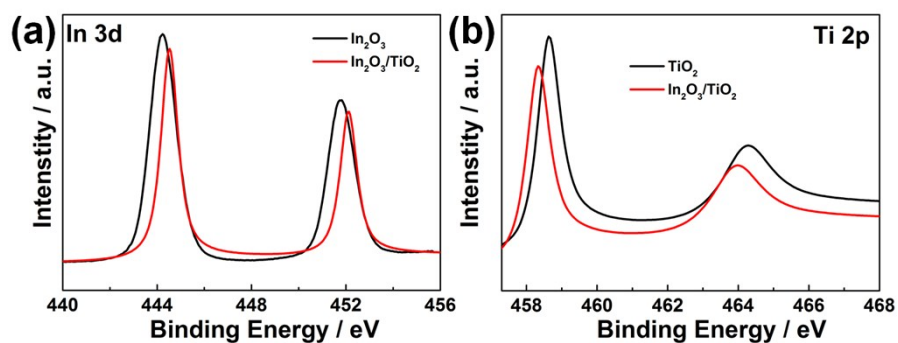

**Figure S4.** (a) In3d and (b) Ti2p core-level XPS spectra of the samples.

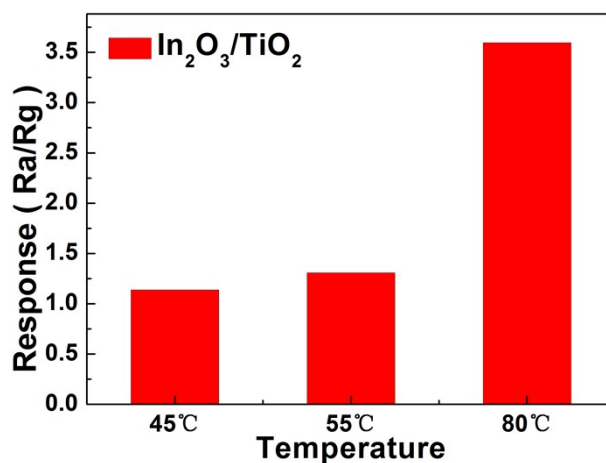

**Figure S5.** Response of ethanol vapor sensors based on  $\text{In}_2\text{O}_3$  nanoparticle/ $\text{TiO}_2$  nanobelt heterostructures (mole ratio 1:1) upon exposure to 100 ppm of ethanol vapor at low operating temperature (45 °C, 55 °C and 80 °C).

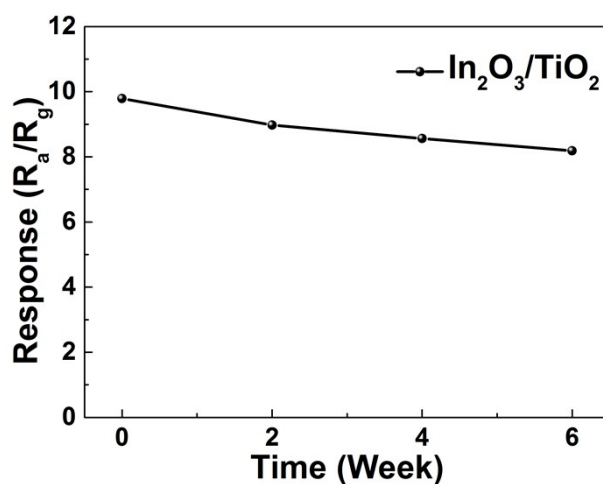

**Figure S6.** The sensing stability of the  $\text{In}_2\text{O}_3$  nanoparticle/ $\text{TiO}_2$  nanobelt heterostructures (mole ratio 1:1) sensor to 100 ppm ethanol with respect to a low

temperature of 100 °C.

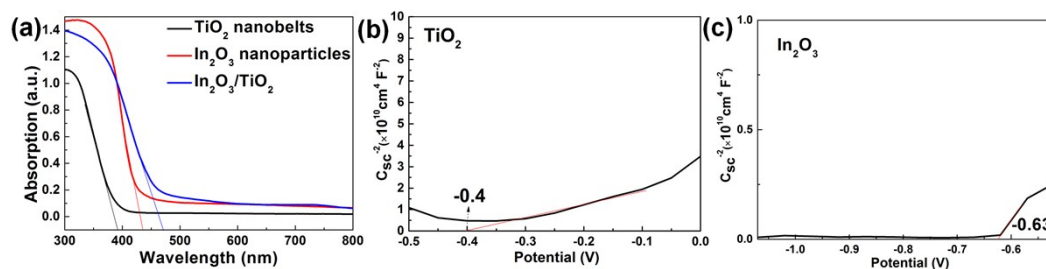

**Figure S7.** (a) UV-vis diffuse reflectance spectra of TiO<sub>2</sub> nanobelts, In<sub>2</sub>O<sub>3</sub> nanoparticles and In<sub>2</sub>O<sub>3</sub> nanoparticle/TiO<sub>2</sub> nanobelt heterostructures. Mott-Schottky plots of (b) TiO<sub>2</sub> nanobelts and (c) In<sub>2</sub>O<sub>3</sub> nanoparticles collected at a frequency of 1000 Hz in dark.

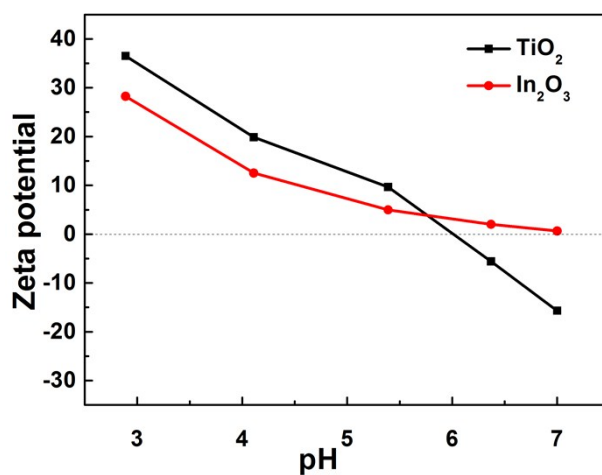

**Figure S8.** Zeta potentials of TiO<sub>2</sub> nanobelts and In<sub>2</sub>O<sub>3</sub> nanoparticles in aqueous solution at different pH values.
